# Supplementary material
Source: Springer Nature journal article supplement (https://www.springermedizin.de/resource/supplementary/13002_2006_26_MOESM1_ESM.pdf/9627004)

76° 45'

32° 7.77'

76° 53.83'

32° 7.77'

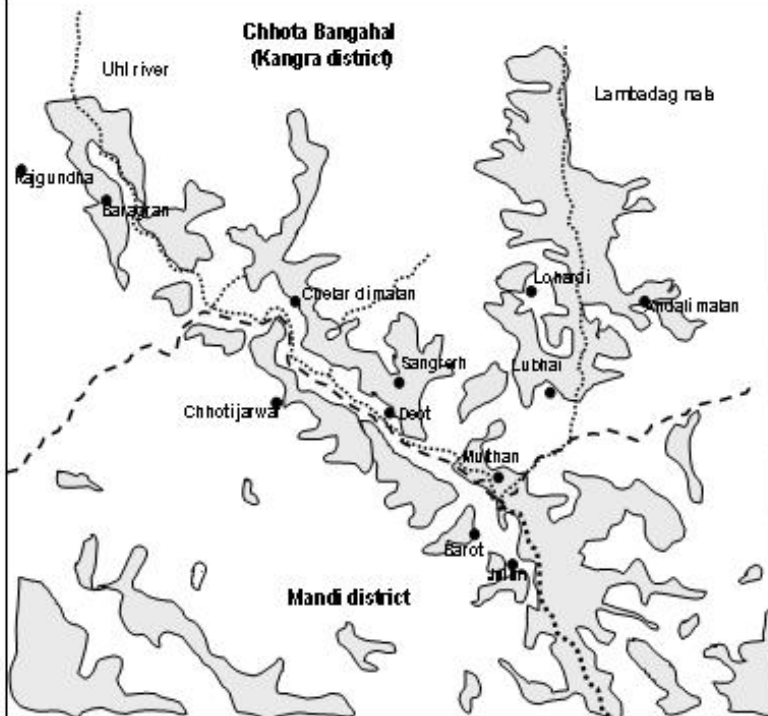

32°

76° 45'

32°

76° 53.83'

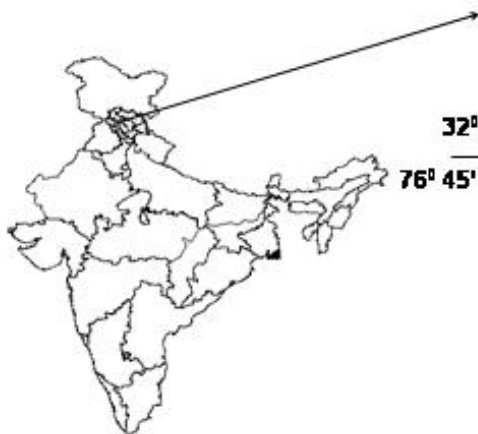

Supplement: MOESM1 [file 9627004]
